# Supplementary material for: Investigation of the electrochemical performance and structural stability of O6-type lithium-rich layered oxide as a positive electrode active material for improved lithium battery performance
Source: Royal Society of Chemistry journal article supplement (doi:10.1039/d4ta05119j), 2024-01-01
Supplement: d4ta05119j1.pdf [file d4ta05119j1.pdf]

## Supplementary Information:

# Investigation of the Electrochemical Performance and Structural Stability of O6-Type Lithium-Rich Layered Oxide as a Positive Electrode Active Material for Improved Lithium Battery Performance

*Valentin Saïbi<sup>1</sup> Laurent Castro<sup>2</sup>, Maxim Avdeev<sup>3,4</sup>, Issei Sugiyama<sup>5</sup>, Stéphanie Belin<sup>6</sup>, Claude Delmas<sup>1</sup>, Marie Guignard<sup>1,\*</sup>*

<sup>1</sup>Univ. Bordeaux, CNRS, Bordeaux INP, ICMCB, UMR 5026, F-33600 Pessac

<sup>2</sup> Material Engineering Division, Toyota Motor Europe NV/SA, Technical Center, 1930

Zaventem, Belgium

<sup>3</sup>Australian Nuclear Science and Technology Organisation (ANSTO), Lucas Heights, NSW  
2234, Australia

<sup>4</sup>School of Chemistry, University of Sydney, Sydney, NSW 2006, Australia

<sup>5</sup>Advanced Battery Division, Toyota Motor Corporation, Mishuku 1200, Susono-shi, Shizuoka,  
Japan 410-1193

<sup>6</sup>Synchrotron SOLEIL, L'Orme des Merisiers, 91190 Saint-Aubin, France

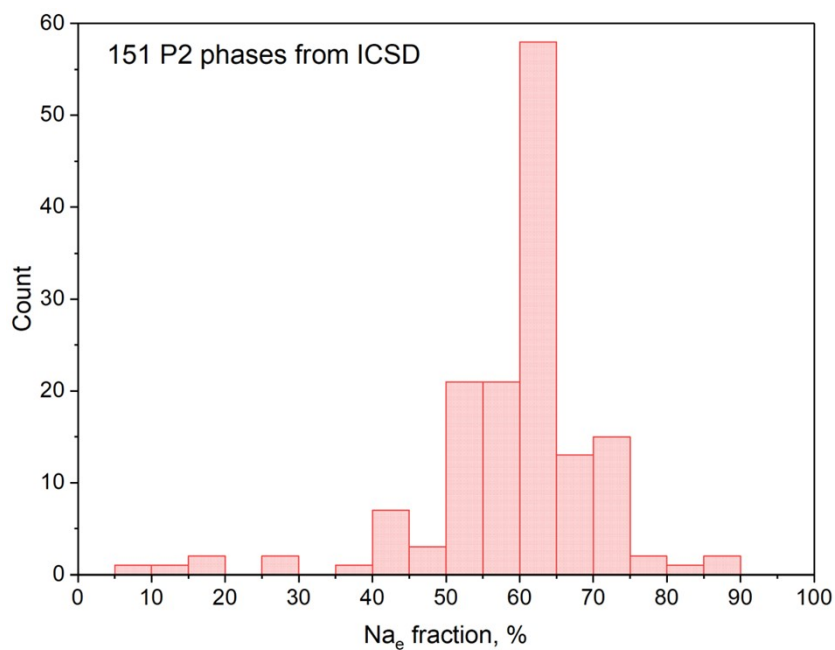

**Figure S1.** Analysis of the Na<sub>e</sub> site occupancy for the 152 sodium phases of P2-type structures reported in the Inorganic Crystal Structure Database (<https://icsd.products.fiz-karlsruhe.de/>).

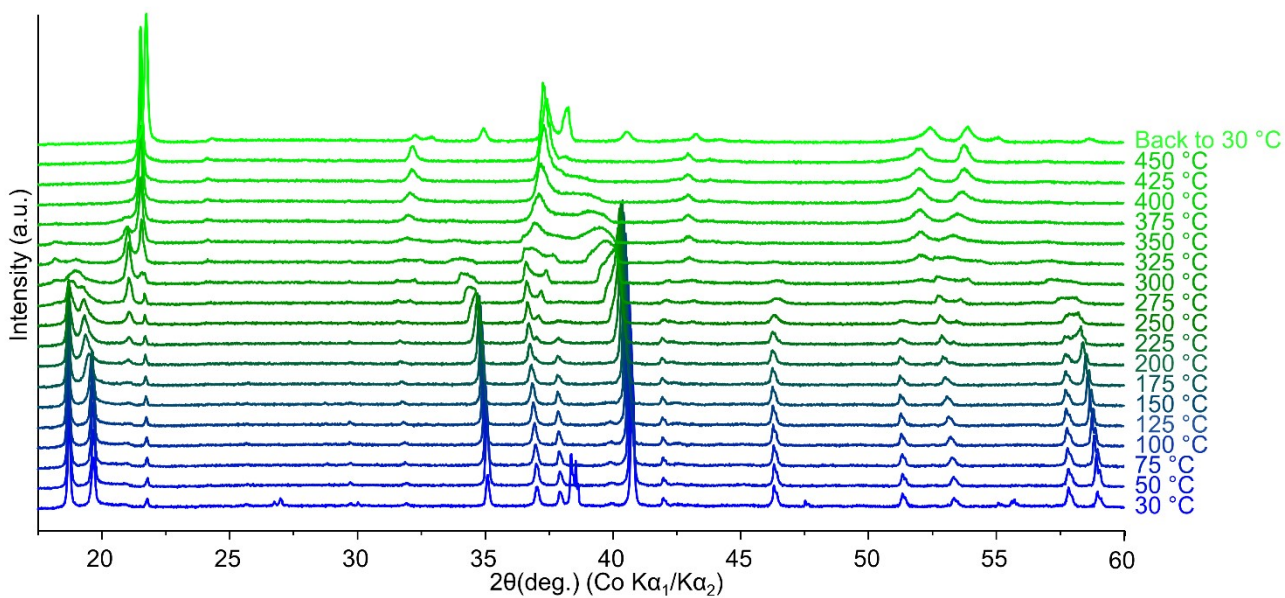

**Figure S2.** Variable temperature X-ray diffraction patterns recorded during the ion exchange reaction between “P2-Na<sub>5/6</sub>Li<sub>1/6</sub>Ni<sub>1/6</sub>Mn<sub>4/6</sub>O<sub>2</sub>” and LiCl.

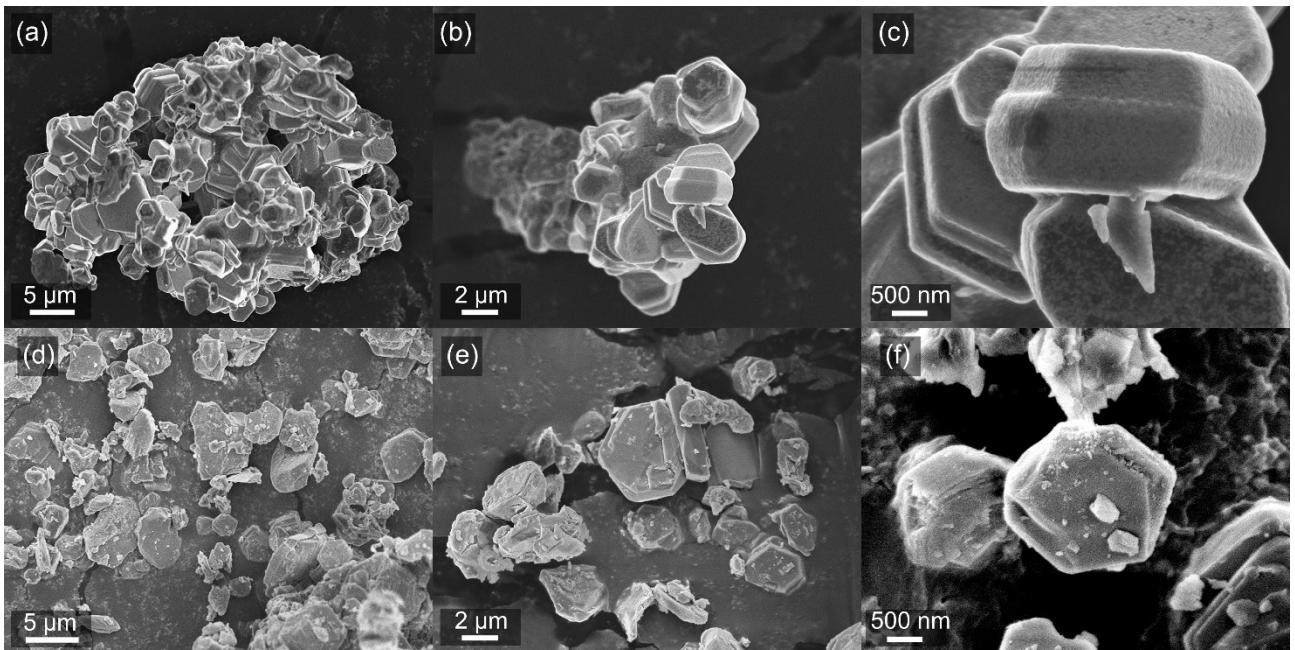

**Figure S3:** Scanning electron microscopy images of particles of: (a), (b) and (c) the “P2- $\text{Na}_{5/6}\text{Li}_{1/6}\text{Ni}_{1/6}\text{Mn}_{4/6}\text{O}_2$ ” phase; (d), (e) and (f) the “O6- $\text{LiNi}_{1/6}\text{Mn}_{4/6}\text{O}_2$ ” phase.

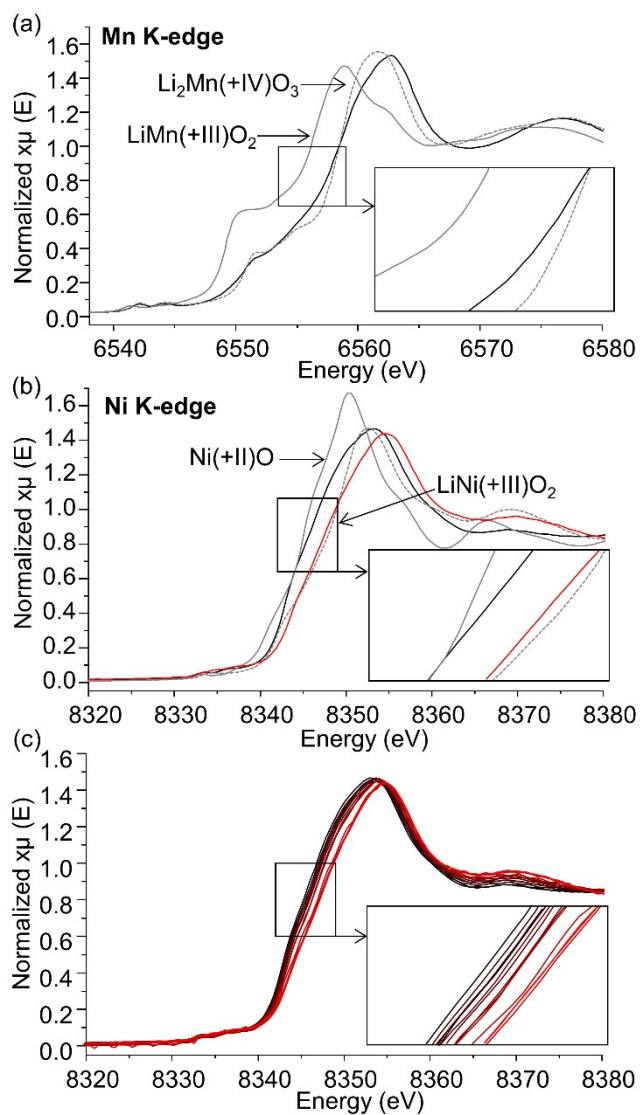

**Figure S4.** (a) and (b) Spectra recorded at the Mn and Ni K-edges, respectively, for the pristine “O6- $\text{LiNi}_{1/6}\text{Mn}_{4/6}\text{O}_2$ ” (in black) and for the O6 phase obtained after the deintercalation of 0.3 moles of  $\text{Li}^+$  ions per formula unit (in red in (b)). Spectra for different reference compounds containing  $\text{Mn}^{3+}$  or  $\text{Mn}^{4+}$  ions and  $\text{Ni}^{2+}$  and  $\text{Ni}^{3+}$  ions are also shown. (c) *Operando* X-ray absorption spectroscopy experiment during the deintercalation of 0.3 moles of  $\text{Li}^+$  ions per formula unit.

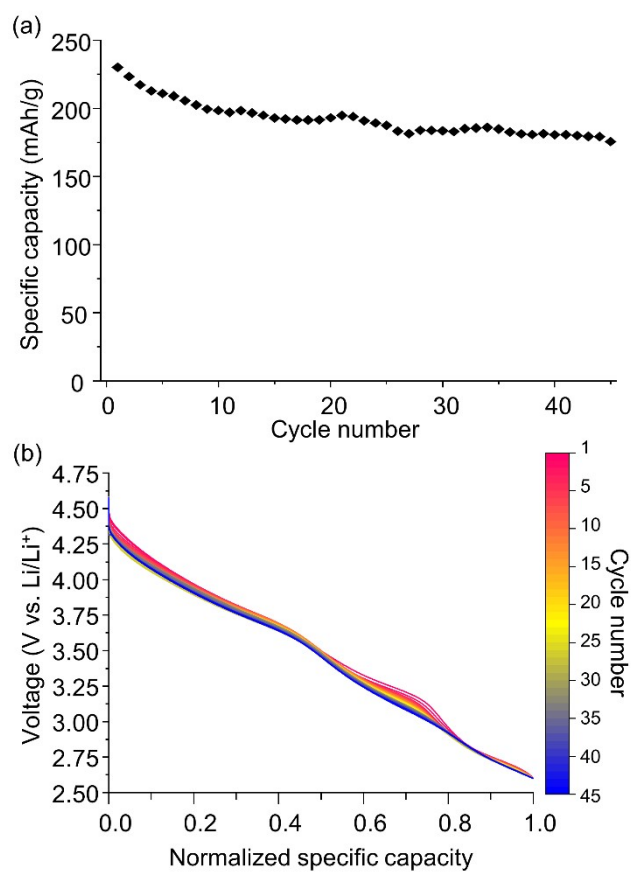

**Figure S5.** 45 galvanostatic cycles of charge and discharge of a lithium battery cell using the “O6- $\text{LiNi}_{1/6}\text{Mn}_{4/6}\text{O}_2$ ” phase at the positive electrode. (a) Evolution of the discharge specific capacity as a function the cycle number. (b) Evolution of the cell voltage V as a function of the normalized specific capacity of the battery.
